# Supplementary figures and images for: Aquatic Thermal Reservoirs of Microbial Life in a Remote and Extreme High Andean Hydrothermal System
Source: MDPI journal article supplement (doi:10.3390/microorganisms8020208), 2020-02-03

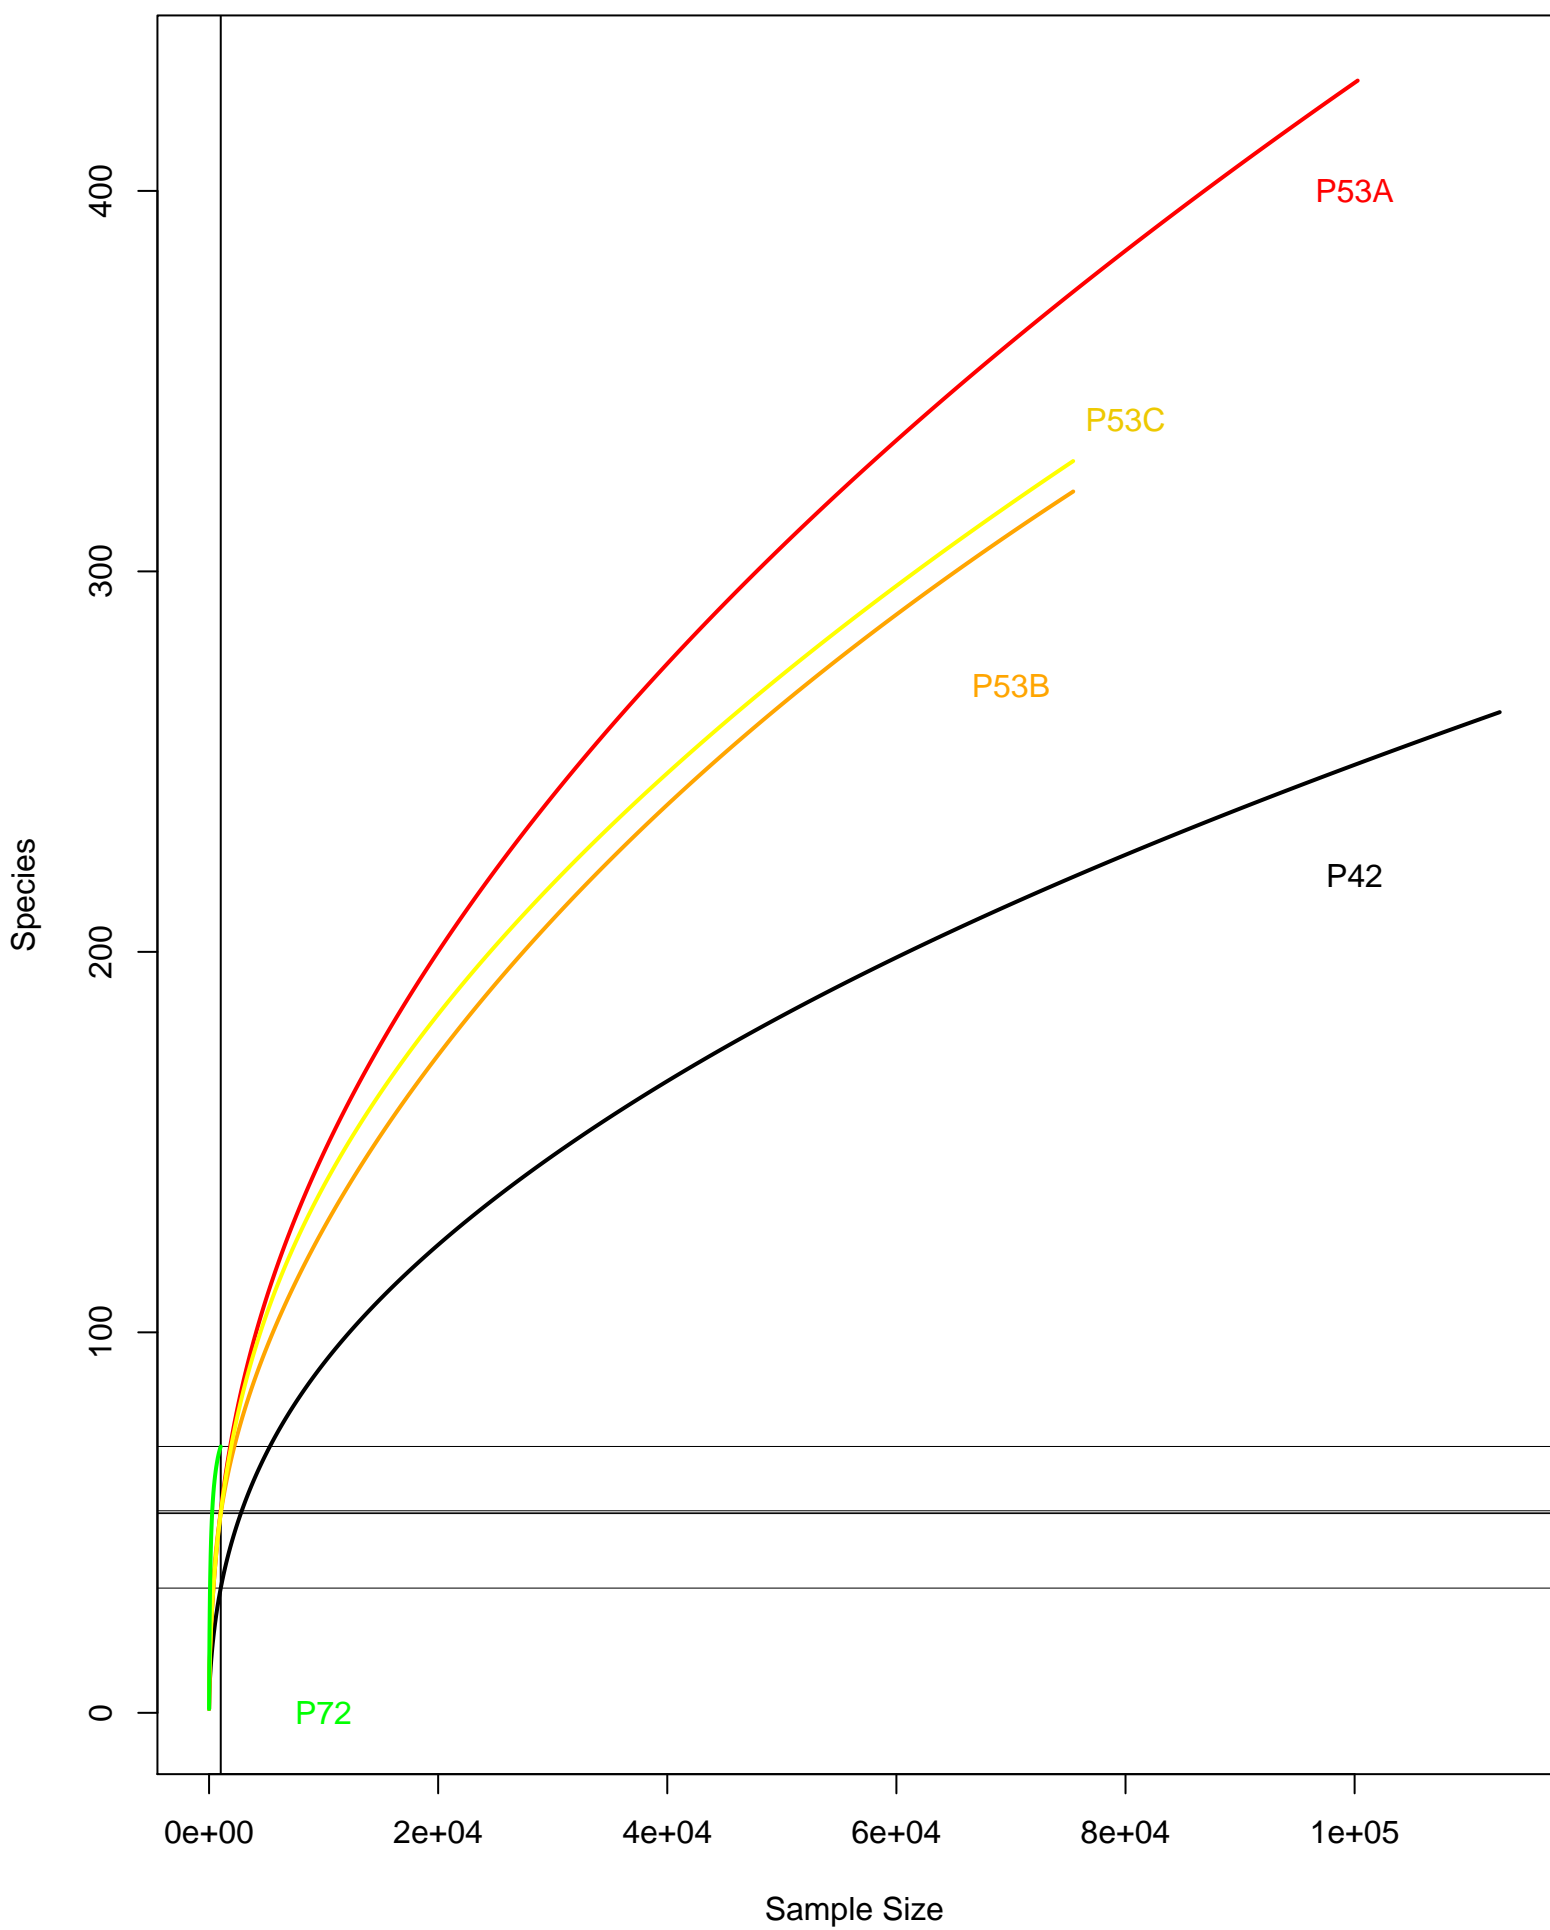

Supplement: s1 [file s1]

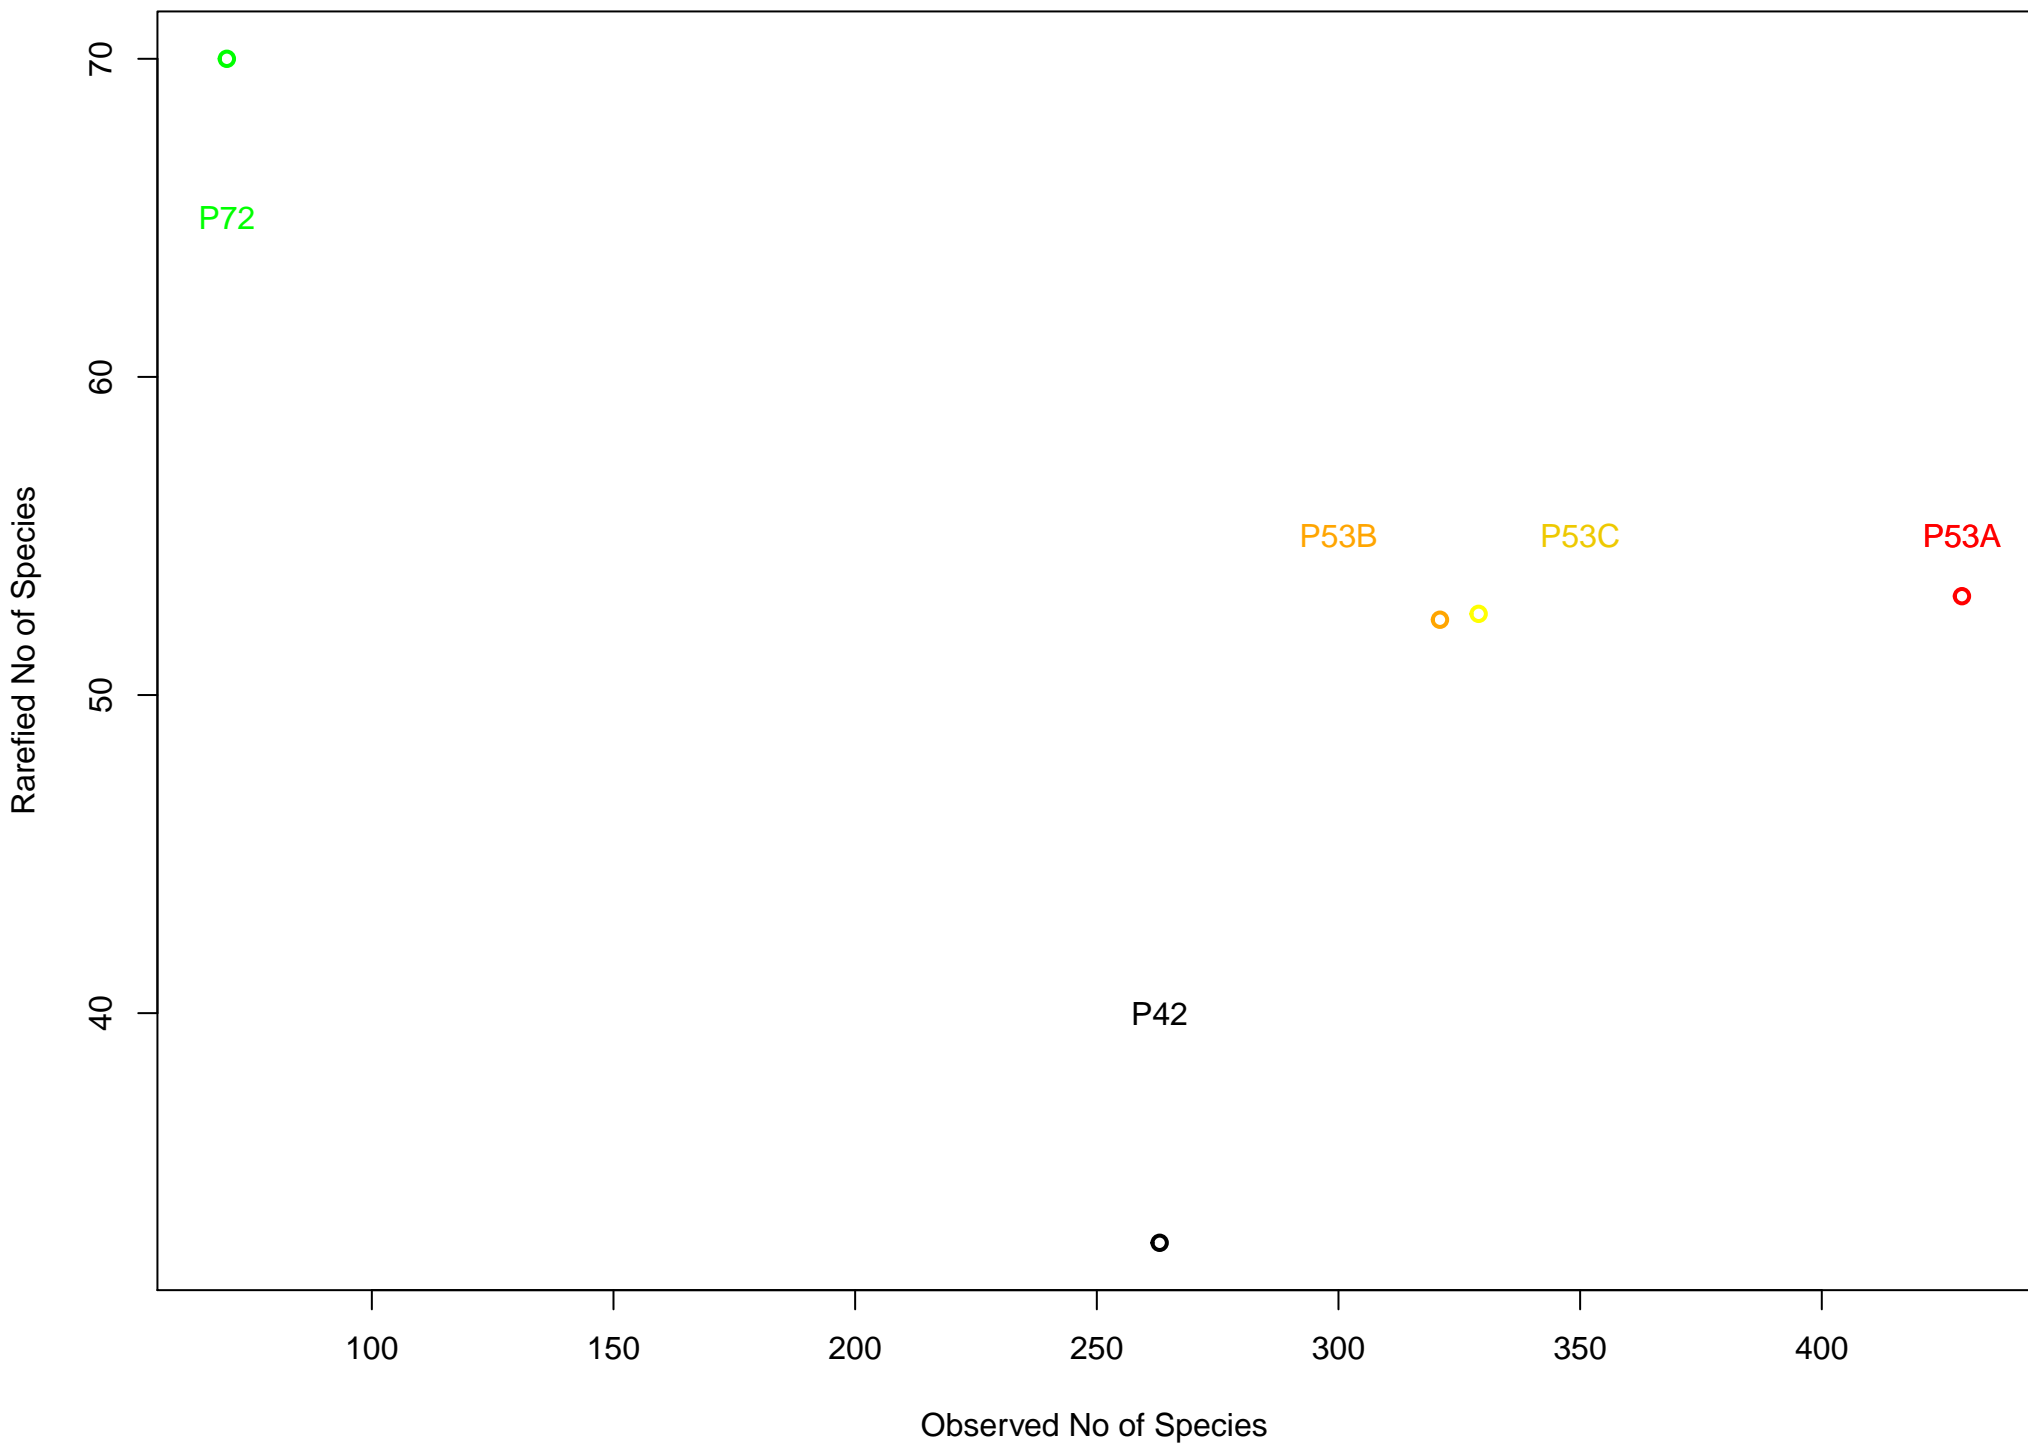

Supplement: s1 [file s1]
